# Supplementary material for: Self-powered solar-blind UV/visible dual-band photodetection based on a solid-state PEDOT:PSS/α-Ga2O3 nanorod array/FTO photodetector
Source: Royal Society of Chemistry journal article supplement (doi:10.1039/d1tc04091j), 2021-01-01
Supplement: d1tc04091j1.pdf [file d1tc04091j1.pdf]

## Supporting Information

### **Self-powered solar-blind UV/visual dual-band photodetection based on a solid-state PEDOT:PSS/ $\alpha$ -Ga<sub>2</sub>O<sub>3</sub> nanorod array/FTO photodetector**

Ming-Ming Fan,<sup>\*a</sup> Kang-Li Xu<sup>a</sup>, Xiu-Yan Li,<sup>a</sup> Gao-Hang He,<sup>\*b</sup> and Ling Cao,<sup>\*a</sup>

<sup>a</sup> College of Physics and Optoelectronics, Taiyuan University of Technology, Taiyuan 030024, China.

<sup>b</sup> Vacuum Interconnected Nanotech Workstation (Nano-X), Suzhou Institute of Nano-Tech and Nano-Bionics (SINANO), Chinese Academy of Sciences (CAS), Suzhou 215123, China.

\* Corresponding Author:

fanmingming08@163.com; caoling@tyut.edu.cn; ghhe2018@sinano.ac.cn.

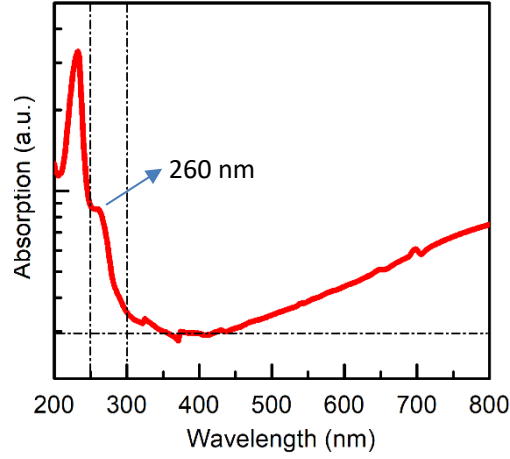

Fig. S1. Absorption of PEDOT:PSS film on glass in logarithmic scale.

The same processes in the article were employed to fabricate PEDOT:PSS film on glass. The absorption spectrum was investigated by a double-beam UV-vis spectrophotometer. Glass substrate was selected as the background. Thus, the absorption of PEDOT:PSS film can be evaluated with the elimination of the absorption of glass substrate.

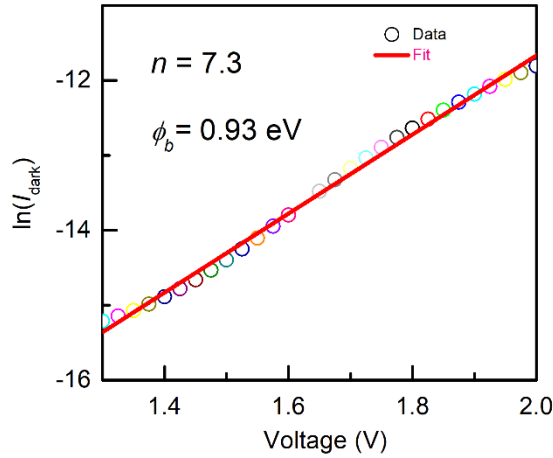

Fig. S2. Plot and linear fit of  $\ln(I_{dark})$  as a function of voltage.

For thermionic emission and  $V > 3kT/q$ , the  $I$ - $V$  characteristic of PEDOT:PSS/ $\alpha$ -Ga<sub>2</sub>O<sub>3</sub> Schottky junction is fitted by the following equations:<sup>1</sup>

$$I_{dark} = I_0 \exp(qV/nkT) \quad (1)$$

$$I_0 = SA^*T^2 \exp(-\phi_b/kT) \quad (2)$$

$$\ln(I_{dark}) = \ln(I_0) + qV/nkT \quad (3)$$

where  $I_0$  is the saturation current,  $S$  is the contact area,  $A^*$  is the effective Richardson coefficient,  $q$  is the electron charge,  $\phi_b$  is the barrier height,  $k$  is the Boltzmann constant,  $T$  is the absolute temperature, and  $n$  is the ideality factor. As shown in equation (3),  $n$  and  $\phi_b$  can be evaluated by the slope and the intercept according to the plot of  $\ln(I_{dark})$  vs  $V$ , respectively.  $A^*$  is assumed to be  $33 \text{ A cm}^{-2} \text{ K}^{-2}$  by taking the

electron effective mass of  $0.276 m_0$ .<sup>2</sup>  $S$  is about  $0.25 \text{ cm}^2$ . Therefore,  $n$  and  $\phi_b$  can be roughly estimated to be  $\sim 7.3$  and  $\sim 0.93$  eV, respectively.

References:

1. R. Suzuki, S. Nakagomi, Y. Kokubun, N. Arai and S. Ohira, *Appl. Phys. Lett.*, 2009, **94**, 222102.
2. H. He, R. Orlando, M. A. Blanco, R. Pandey, E. Amzallag, I. Baraille and M. R erat, *Phys. Rev. B*, 2006, **74**, 195123.
